# Supplementary material
Source: PubMed Central journal article supplement (PMC8294202)
Supplement: NIHMS1630355-supplement-Supplemental_Material.pdf [file NIHMS1630355-supplement-Supplemental_Material.pdf]

## **Collagenase-cleavable peptide amphiphile micelles as a novel theranostic strategy in atherosclerosis**

*Deborah D. Chin<sup>a</sup>, Christopher Poon<sup>a,^</sup>, Noah Trac<sup>a</sup>, Jonathan Wang<sup>a</sup>, Jackson Cook<sup>a</sup>, Johan Joo<sup>a</sup>, Zhangjingyi Jiang<sup>a</sup>, Naomi Sulit Sta Maria<sup>b</sup>, Russell E. Jacobs<sup>b</sup>, Eun Ji Chung<sup>\*a,c,d,e,f,g</sup>*

<sup>a</sup>Department of Biomedical Engineering, University of Southern California, Los Angeles, CA, USA

<sup>b</sup>Zilkha Neurogenetic Institute and Department of Physiology and Neuroscience, Keck School of Medicine, University of Southern California, Los Angeles, CA, USA

<sup>c</sup>Eli and Edythe Broad Center for Regenerative Medicine and Stem Cell Research, Keck School of Medicine, University of Southern California, Los Angeles, CA, USA

<sup>d</sup>Norris Comprehensive Cancer Center, Keck School of Medicine, University of Southern California, Los Angeles, CA, USA

<sup>e</sup>Department of Chemical Engineering and Materials Science, University of Southern California, Los Angeles, CA, USA

<sup>f</sup>Department of Medicine, Division of Nephrology and Hypertension, Keck School of Medicine, University of Southern California, Los Angeles, CA, USA

<sup>g</sup>Department of Surgery, Division of Vascular Surgery and Endovascular Therapy, Keck School of Medicine, University of Southern California, Los Angeles, CA, USA

<sup>^</sup>Current affiliation: Emergent Biosolutions, San Diego, CA, USA

\*Corresponding author

Eun Ji Chung  
Department of Biomedical Engineering  
University of Southern California  
1042 Downey Way, DRB 140  
Los Angeles, CA 90089  
Tel.: +1-213-740-2825  
Fax: +1-213-821-3897  
Email: eunchung@usc.edu

Keywords: theranostic nanoparticles, vulnerable plaques, collagen, magnetic resonance imaging, atherosclerosis

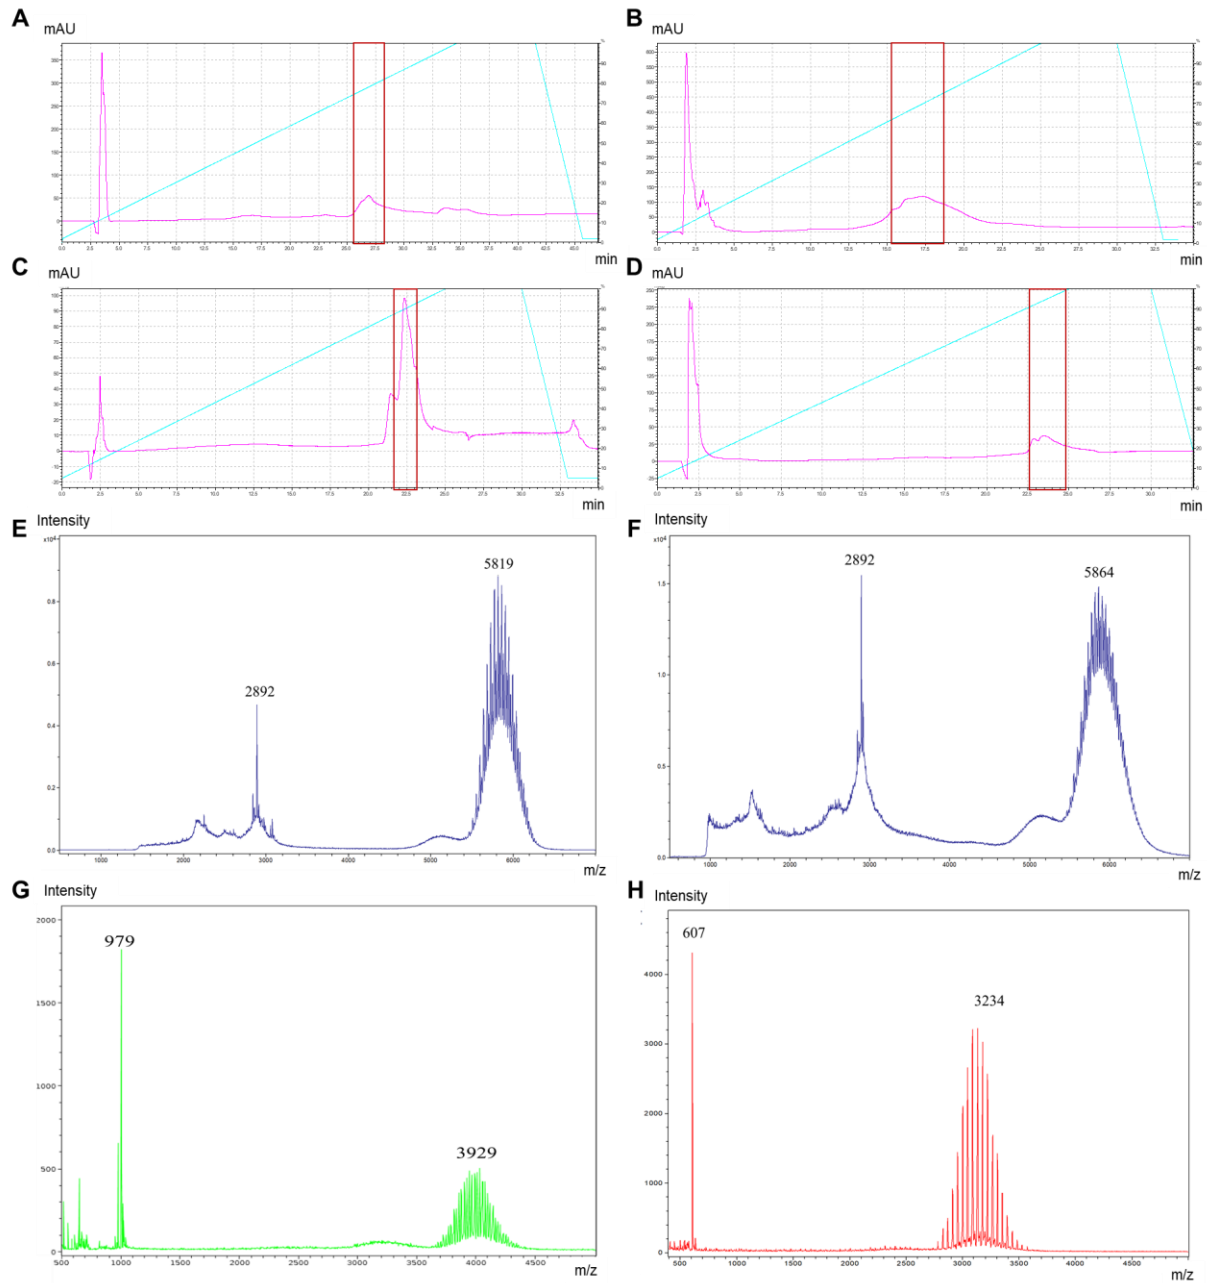

**Figure S1** HPLC chromatograms and MALDI-TOF spectrum of A, E) MCP-1 PA with m/z 5819 and B, F) scrambled MCP-1 PA with m/z 5864 (expected:5830 m/z), C, G) Col-1 PA with m/z 3929 (expected:3920 m/z) and D, H) DSPE-PEG-DTPA(Gd) with m/z 3234 (expected:3322 m/z). Red boxes indicate elution times.

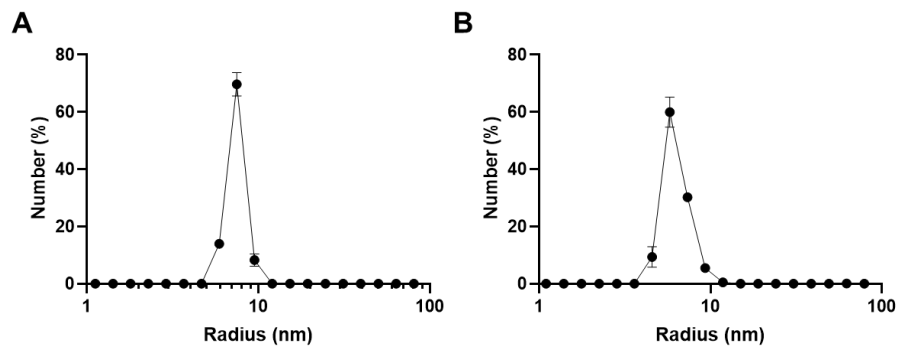

**Figure S2** Dynamic light scattering of A) MCG PAMs indicate particle diameter to be approximately  $14.8 \pm 0.6$  nm and B) SCG PAMs to be  $13.2 \pm 2.2$  nm (N=6).

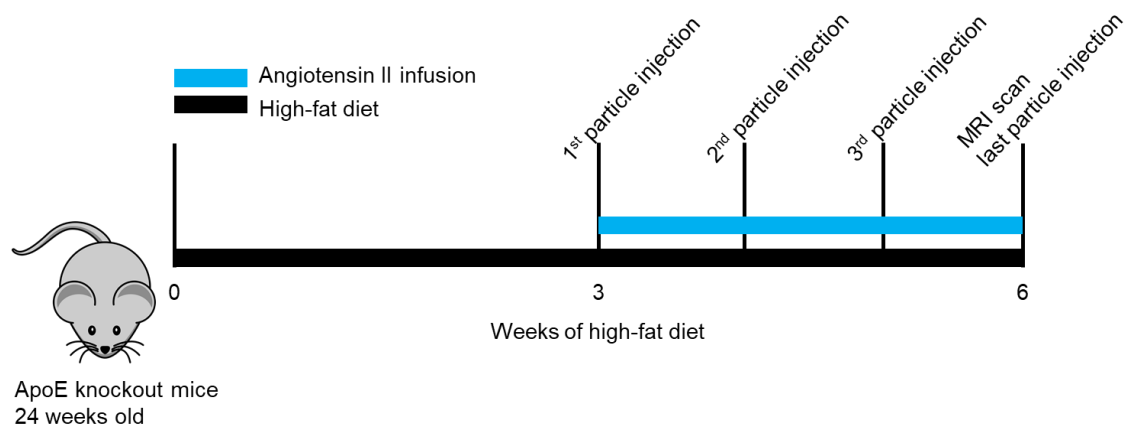

**Figure S3** Timeline of animal studies. ApoE<sup>-/-</sup> mice 24 weeks of age were given an atherogenic diet for a total of six weeks. After three weeks of atherogenic diet, mice were given angiotensin II infusions for three weeks while continuing the diet, and subsequently given their first particle injection via IV tail vein. Mice were given one injection per week for a total of four injections of MCG PAM, SCG PAM, or PBS.

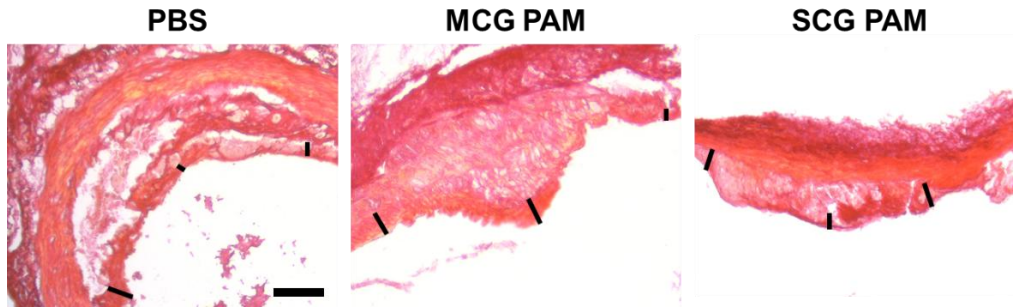

**Figure S4** Example of a fibrous cap measurement. Black lines indicate thickness measurements at two shoulders or the center of the plaque. Three measurements for each cap were taken per plaque and averaged. Scale bar 100  $\mu\text{m}$ .

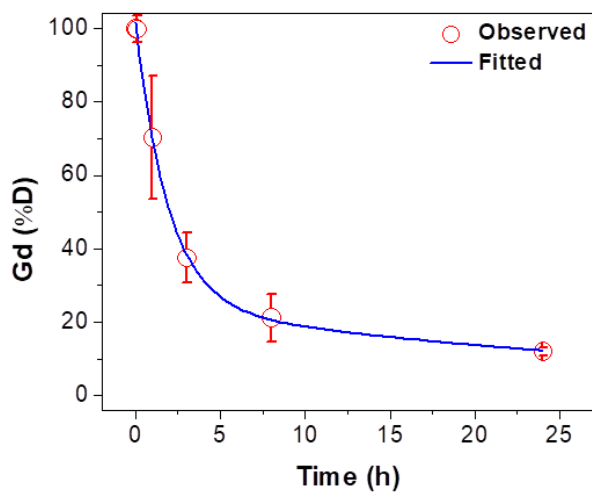

**Figure S5** Half-life of MCG PAMs were determined to be  $1.3 \pm 0.1$  and  $23.9 \pm 1.8$  h for  $t_{1/2\alpha}$  and  $t_{1/2\beta}$  (N=3).

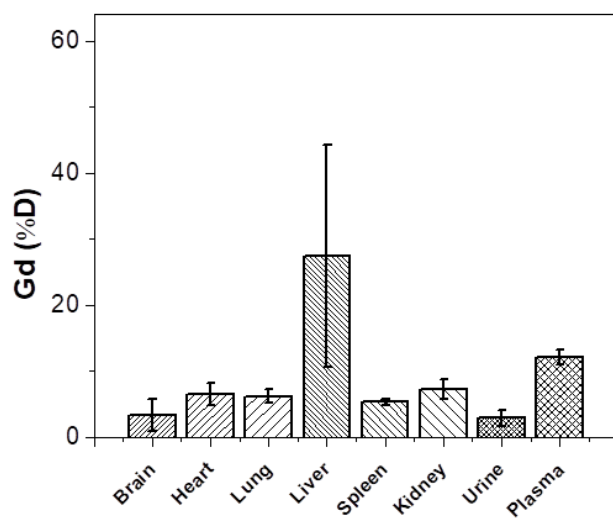

**Figure S6** Biodistribution of MCG PAMs show particle accumulation in the liver, which is similar to other nanoparticles. Gd signal is also enhanced in plasma (N=3).
